# Supplementary material for: Identification of Young High-Functioning Autism Individuals Based on Functional Connectome Using Graph Isomorphism Network: A Pilot Study
Source: MDPI journal article supplement (doi:10.3390/brainsci12070883), 2022-07-05
Supplement: s1 [file s1]

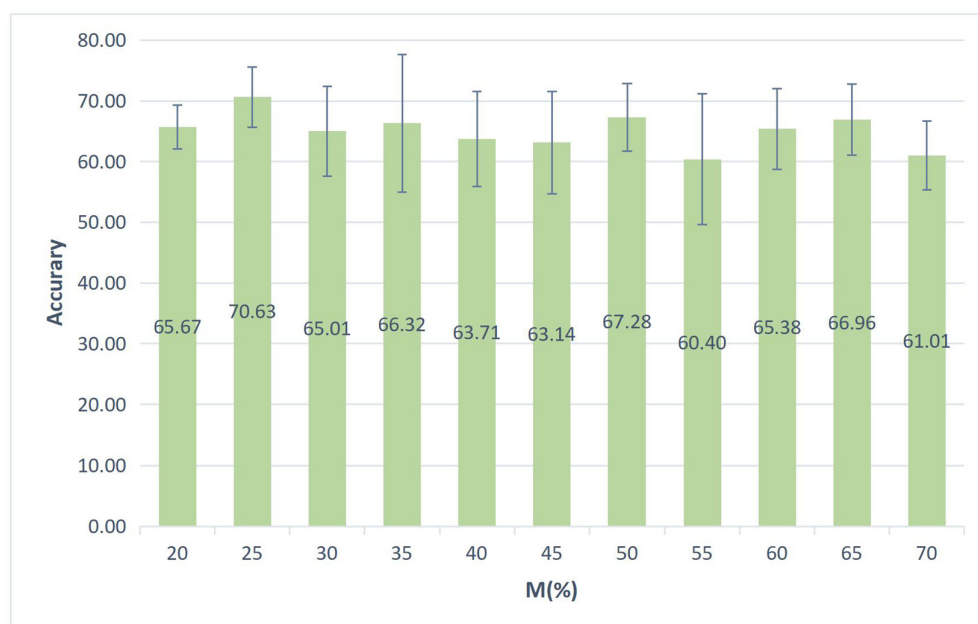

**Figure S1.** The classification accuracy of our proposed GIN model with different threshold values.

**Table S1.** The coordinates of salient ROIs for ASD group in four hidden layers.

| ASD |                       |                 |                       |                 |                          |                 |                            |                 |
|-----|-----------------------|-----------------|-----------------------|-----------------|--------------------------|-----------------|----------------------------|-----------------|
| NO. | 1 <sup>st</sup> layer |                 | 2 <sup>nd</sup> layer |                 | 3 <sup>rd</sup> layer    |                 | 4 <sup>th</sup> layer      |                 |
|     | ROI                   | Coordinates     | ROI                   | Coordinates     | ROI                      | Coordinates     | ROI                        | Coordinates     |
| 1   | LH_Default_PFC_1      | (-26, -32, -18) | LH_Vis_6              | (-14, -44, -2)  | RH_Cont_PFCI_4           | (46, 24, 26)    | LH_Vis_6                   | (-14, -44, -2)  |
| 2   | RH_Cont_PFCmp_2       | (8, 24, 56)     | LH_DorsAttn_Post_3    | (-26, -70, 38)  | RH_Cont_PFCmp_1          | (8, 30, 28)     | RH_Cont_PFCI_4             | (46, 24, 26)    |
| 3   | LH_Cont_Cing_1        | (-4, -28, 28)   | LH_Default_PFC_5      | (-52, 22, 8)    | RH_Cont_Par_1            | (62, -38, 36)   | LH_Limbic_TempPole_4       | (-42, 8, -18)   |
| 4   | LH_Default_PFC_1      | (-34, 20, -14)  | LH_Default_pCunPCC_4  | (-6, -54, 42)   | RH_Default_Par_3         | (50, -58, 44)   | RH_Vis_9                   | (8, -76, 8)     |
| 5   | LH_Default_PFC_4      | (-12, 64, -6)   | LH_Default_PFC_1      | (-26, -32, -18) | RH_Default_Temp_1        | (48, 12, -30)   | RH_Vis_11                  | (42, -80, 10)   |
| 6   | LH_Default_PFC_5      | (-52, 22, 8)    | RH_SomMot_19          | (20, -30, 70)   | LH_Vis_6                 | (-14, -44, -2)  | RH_DorsAttn_Post_1         | (50, -54, -16)  |
| 7   | LH_Default_pCunPCC_4  | (-6, -54, 42)   | RH_Cont_PFCI_4        | (46, 24, 26)    | LH_Limbic_TempPole_2     | (-44, -20, -30) | RH_DorsAttn_Post_2         | (52, -60, 10)   |
| 8   | RH_SomMot_19          | (20, -30, 70)   | LH_Limbic_TempPole_2  | (-44, -20, -30) | LH_Cont_Cing_1           | (-4, -28, 28)   | RH_SalVentAttn_FrOperIns_1 | (40, 6, -16)    |
| 9   | RH_Default_Par_1      | (46, -70, 28)   | LH_Cont_Cing_1        | (-4, -28, 28)   | LH_Default_Temp_2        | (-60, -18, -22) | RH_Cont_Par_2              | (52, -42, 48)   |
| 10  | RH_Default_Par_3      | (50, -58, 44)   | LH_Default_PFC_4      | (-12, 64, -6)   | LH_Default_PFC_5         | (-52, 22, 8)    | RH_Cont_PFCI_2             | (30, 58, 4)     |
| 11  | LH_DorsAttn_Post_3    | (-26, -70, 38)  | RH_Vis_6              | (12, -92, -6)   | RH_Vis_6                 | (12, -92, -6)   | RH_Default_Par_3           | (50, -58, 44)   |
| 12  | RH_Vis_6              | (12, -92, -6)   | RH_Default_Par_3      | (50, -58, 44)   | RH_DorsAttn_Post_2       | (52, -60, 10)   | RH_Default_Temp_2          | (60, -12, -20)  |
| 13  | RH_Default_PFCv_1     | (50, 28, 0)     | LH_DorsAttn_Post_2    | (-56, -60, -2)  | LH_Vis_12                | (-12, -72, 22)  | LH_Vis_12                  | (-12, -72, 22)  |
| 14  | RH_Default_PFCdPFCm_1 | (4, 36, -14)    | LH_Cont_PFCI_3        | (-42, 40, 16)   | LH_DorsAttn_Post_3       | (-26, -70, 38)  | LH_DorsAttn_Post_4         | (-54, -26, 42)  |
| 15  | LH_Vis_10             | (-12, -70, 8)   | LH_Default_PFC_1      | (-34, 20, -14)  | LH_SalVentAttn_ParOper_2 | (-62, -26, 28)  | LH_Limbic_TempPole_2       | (-44, -20, -30) |
| 16  | LH_Vis_11             | (-40, -84, 10)  | RH_Vis_9              | (8, -76, 8)     | LH_Limbic_TempPole_3     | (-28, 10, -34)  | LH_Limbic_TempPole_3       | (-28, 10, -34)  |
| 17  | LH_Vis_12             | (-12, -72, 22)  | RH_Vis_12             | (20, -90, 22)   | LH_Cont_PFCI_3           | (-42, 40, 16)   | LH_Cont_PFCI_3             | (-42, 40, 16)   |
| 18  | LH_DorsAttn_Post_2    | (-56, -60, -2)  | RH_Cont_PFCmp_2       | (8, 24, 56)     | LH_Default_Par_1         | (-48, -58, 18)  | LH_Cont_Cing_1             | (-4, -28, 28)   |
| 19  | LH_Cont_Cing_2        | (-4, 4, 30)     | RH_Default_Par_1      | (46, -70, 28)   | LH_Default_PFC_1         | (-26, -32, -18) | LH_Default_Temp_2          | (-60, -18, -22) |

|    |                       |                |                       |                 |                       |                |                       |                |
|----|-----------------------|----------------|-----------------------|-----------------|-----------------------|----------------|-----------------------|----------------|
| 20 | RH_Vis_5              | (48, -72, -6)  | LH_Vis_10             | (-12, -70, 8)   | RH_Vis_9              | (8, -76, 8)    | LH_Default_Par_1      | (-48, -58, 18) |
| 21 | RH_Vis_11             | (42, -80, 10)  | LH_Vis_12             | (-12, -72, 22)  | RH_Vis_12             | (20, -90, 22)  | LH_Default_PFC_5      | (-52, 22, 8)   |
| 22 | RH_Vis_12             | (20, -90, 22)  | RH_Vis_5              | (48, -72, -6)   | RH_SomMot_19          | (20, -30, 70)  | LH_Default_PFC_7      | (-8, 60, 20)   |
| 23 | RH_SomMot_18          | (6, -22, 68)   | RH_Vis_11             | (42, -80, 10)   | RH_DorsAttn_Post_1    | (50, -54, -16) | RH_Vis_12             | (20, -90, 22)  |
| 24 | RH_Default_Temp_2     | (60, -12, -20) | RH_SomMot_18          | (6, -22, 68)    | RH_Cont_Par_2         | (52, -42, 48)  | RH_DorsAttn_Post_8    | (26, -62, 58)  |
| 25 | RH_Default_PFCdPFCm_4 | (8, 58, 18)    | RH_Cont_Par_1         | (62, -38, 36)   | RH_Cont_PFCI_5        | (30, 48, 28)   | RH_Cont_Par_1         | (62, -38, 36)  |
| 26 |                       |                | RH_Cont_PFCmp_1       | (8, 30, 28)     | RH_Cont_PFCI_6        | (40, 34, 38)   | RH_Cont_PFCI_5        | (30, 48, 28)   |
| 27 |                       |                | RH_Default_PFCv_1     | (50, 28, 0)     | LH_Vis_8              | (-48, -70, 10) | RH_Cont_PFCmp_2       | (8, 24, 56)    |
| 28 |                       |                | LH_Vis_3              | (-46, -70, -8)  | LH_Vis_10             | (-12, -70, 8)  | RH_Default_Par_1      | (46, -70, 28)  |
| 29 |                       |                | LH_Vis_5              | (-26, -96, -12) | LH_DorsAttn_Post_2    | (-56, -60, -2) | RH_Default_PFCdPFCm_4 | (8, 58, 18)    |
| 30 |                       |                | LH_Vis_8              | (-48, -70, 10)  | LH_Cont_Par_2         | (-34, -62, 48) | LH_Vis_10             | (-12, -70, 8)  |
| 31 |                       |                | LH_Default_Temp_2     | (-60, -18, -22) | LH_Cont_PFCI_4        | (-44, 20, 28)  | LH_DorsAttn_Post_3    | (-26, -70, 38) |
| 32 |                       |                | LH_Default_PFC_3      | (-46, 30, -8)   | LH_Default_Temp_3     | (-56, -6, -12) | LH_Default_Temp_4     | (-58, -30, -4) |
| 33 |                       |                | RH_Vis_7              | (16, -46, -2)   | LH_Default_PFC_4      | (-12, 64, -6)  | RH_Vis_6              | (12, -92, -6)  |
| 34 |                       |                | RH_Vis_10             | (22, -60, 8)    | LH_Default_pCunPCC_4  | (-6, -54, 42)  | RH_Vis_7              | (16, -46, -2)  |
| 35 |                       |                | RH_Default_Temp_1     | (48, 12, -30)   | RH_Vis_1              | (38, -34, -24) | RH_DorsAttn_PrCv_1    | (52, 10, 20)   |
| 36 |                       |                | RH_Default_PFCdPFCm_4 | (8, 58, 18)     | RH_Vis_7              | (16, -46, -2)  | RH_Cont_PFCmp_1       | (8, 30, 28)    |
| 37 |                       |                |                       |                 | RH_Vis_11             | (42, -80, 10)  | RH_Default_Temp_1     | (48, 12, -30)  |
| 38 |                       |                |                       |                 | RH_DorsAttn_PrCv_1    | (52, 10, 20)   | RH_Default_PFCdPFCm_2 | (8, 42, 4)     |
| 39 |                       |                |                       |                 | RH_Cont_PFCI_2        | (30, 58, 4)    |                       |                |
| 40 |                       |                |                       |                 | RH_Cont_PFCmp_2       | (8, 24, 56)    |                       |                |
| 41 |                       |                |                       |                 | RH_Default_Par_1      | (46, -70, 28)  |                       |                |
| 42 |                       |                |                       |                 | RH_Default_Temp_2     | (60, -12, -20) |                       |                |
| 43 |                       |                |                       |                 | RH_Default_PFCdPFCm_4 | (8, 58, 18)    |                       |                |

for each layer, we took the ROIs that selected as the top salient ROIs for more than half of the times in the 10-folds (above 5 times) as the final salient ROIs. So the number of salient ROIs varied for each layer.

**Table S2.** The serial numbers and coordinates of salient ROIs for TD group in four hidden layers.

| TD |                       |                 |                       |                 |                       |                |                            |                 |
|----|-----------------------|-----------------|-----------------------|-----------------|-----------------------|----------------|----------------------------|-----------------|
| NO | 1 <sup>st</sup> layer |                 | 2 <sup>nd</sup> layer |                 | 3 <sup>rd</sup> layer |                | 4 <sup>th</sup> layer      |                 |
|    | ROI                   | Coordinates     | ROI                   | Coordinates     | ROI                   | Coordinates    | ROI                        | Coordinates     |
| 1  | LH_Default_PHC_1      | (-26, -32, -18) | LH_Default_pCunPCC_2  | (-6, -54, 28)   | LH_Default_Temp_4     | (-58, -30, -4) | LH_DorsAttn_PrCv_1         | (-48, 6, 28)    |
| 2  | RH_Cont_PFCmp_2       | (8, 24, 56)     | RH_Default_PFCdPFCm_5 | (16, 46, 44)    | LH_Default_Par_3      | (-58, -54, 28) | LH_SalVentAttn_ParOper_2   | (-62, -26, 28)  |
| 3  | RH_Default_Par_1      | (46, -70, 28)   | LH_Vis_1              | (-24, -54, -10) | LH_Default_Par_4      | (-46, -66, 38) | LH_SalVentAttn_FrOperIns_1 | (-40, -4, -4)   |
| 4  | LH_SomMot_5           | (-52, -22, 18)  | RH_Vis_1              | (38, -34, -24)  | LH_Default_PFC_6      | (-6, 44, 8)    | LH_SalVentAttn_FrOperIns_3 | (-38, 0, 10)    |
| 5  | LH_DorsAttn_Post_3    | (-26, -70, 38)  | LH_Vis_2              | (-26, -78, -14) | LH_Default_PFC_7      | (-8, 60, 20)   | LH_Default_Temp_2          | (-60, -18, -22) |
| 6  | LH_DorsAttn_Post_7    | (-16, -72, 54)  | LH_Vis_5              | (-26, -96, -12) | LH_Default_pCunPCC_2  | (-6, -54, 28)  | LH_Default_Temp_4          | (-58, -30, -4)  |

|    |                         |                |                                  |                |                                  |                     |                                  |                |
|----|-------------------------|----------------|----------------------------------|----------------|----------------------------------|---------------------|----------------------------------|----------------|
| 7  | LH_Dor-<br>sAttn_Post_8 | (-30, -60, 60) | LH_Vis_11                        | (-40, -84, 10) | RH_SalVentAttn_PrC_1             | (50, 4, 40)         | LH_Default_Par_1                 | (-48, -58, 18) |
| 8  | LH_Cont_Cing_1          | (-4, -28, 28)  | LH_Default_Temp_5                | (-58, -42, 8)  | RH_Limbic_OFC_1                  | (12, 38, -22)       | LH_Default_Par_3                 | (-58, -54, 28) |
| 9  | LH_Default_PFC_5        | (-52, 22, 8)   | LH_Default_Par_3                 | (-58, -54, 28) | RH_Default_Temp_3                | (54, -6, -10)       | LH_Default_PFC_6                 | (-6, 44, 8)    |
| 10 | RH_SomMot_7             | (58, -4, 30)   | LH_Default_Par_4                 | (-46, -66, 38) | RH_Default_Temp_5                | (52, -32, 2)        | LH_Default_PFC_7                 | (-8, 60, 20)   |
| 11 | RH_SomMot_8             | (10, -16, 42)  | LH_Default_PFC_6                 | (-6, 44, 8)    | LH_SalVentAttn_FrOperIns_4       | (-52, 8, 10)        | RH_DorsAttn_Post_1               | (50, -54, -16) |
| 12 | LH_SomMot_3             | (-36, -22, 16) | RH_Vis_5                         | (48, -72, -6)  | LH_Default_Temp_2                | (-60, -18, -<br>22) | RH_DorsAttn_FEF_2                | (26, 8, 58)    |
| 13 | LH_SomMot_6             | (-56, -8, 30)  | RH_Vis_8                         | (30, -94, -4)  | LH_Default_Temp_5                | (-58, -42, 8)       | RH_SalVentAttn_PrC_1             | (50, 4, 40)    |
| 14 | LH_Dor-<br>sAttn_Post_9 | (-6, -60, 56)  | RH_SalVentAttn_PrC_1             | (50, 4, 40)    | LH_Default_Par_1                 | (-48, -58, 18)      | RH_SalVentAttn_Med_1             | (8, 10, 42)    |
| 15 | RH_Vis_11               | (42, -80, 10)  | RH_Limbic_OFC_1                  | (12, 38, -22)  | LH_Default_Par_2                 | (-38, -80, 32)      | RH_Cont_PFCI_2                   | (30, 58, 4)    |
| 16 | RH_SomMot_4             | (44, -28, 18)  | RH_Default_Temp_3                | (54, -6, -10)  | RH_Vis_1                         | (38, -34, -24)      | RH_Default_Temp_2                | (60, -12, -20) |
| 17 | RH_SomMot_6             | (56, -12, 14)  | LH_Vis_7                         | (-6, -92, -4)  | RH_Cont_PFCI_2                   | (30, 58, 4)         | RH_Default_Temp_5                | (52, -32, 2)   |
| 18 | RH_Dor-<br>sAttn_Post_2 | (52, -60, 10)  | LH_Vis_9                         | (-22, -96, 6)  | RH_Default_Temp_2                | (60, -12, -20)      | LH_SomMot_7                      | (-48, -8, 46)  |
| 19 | RH_Dor-<br>sAttn_Post_6 | (14, -74, 52)  | LH_SalVentAttn_ParOper_1         | (-56, -40, 20) | RH_Default_PFCdPFCm_5            | (16, 46, 44)        | LH_SomMot_10                     | (-40, -26, 56) |
| 20 |                         |                | LH_Default_Par_2                 | (-38, -80, 32) | LH_Vis_5                         | (-26, -96, -<br>12) | LH_DorsAttn_Post_10              | (-18, -54, 68) |
| 21 |                         |                | RH_SomMot_18                     | (6, -22, 68)   | LH_Vis_7                         | (-6, -92, -4)       | LH_DorsAttn_FEF_1                | (-32, -4, 54)  |
| 22 |                         |                | LH_Vis_4                         | (-10, -68, -4) | LH_Cont_Par_2                    | (-34, -62, 48)      | LH_Default_Temp_5                | (-58, -42, 8)  |
| 23 |                         |                | LH_Vis_6                         | (-14, -44, -2) | RH_Vis_5                         | (48, -72, -6)       | LH_Default_Par_2                 | (-38, -80, 32) |
| 24 |                         |                | LH_SalVentAttn_FrOperIns_1       | (-40, -4, -4)  | RH_Vis_7                         | (16, -46, -2)       | LH_Default_Par_4                 | (-46, -66, 38) |
| 25 |                         |                | LH_Cont_Par_2                    | (-34, -62, 48) | RH_Vis_8                         | (30, -94, -4)       | LH_Default_pCunPCC_2             | (-6, -54, 28)  |
| 26 |                         |                | LH_Default_PFC_1                 | (-34, 20, -14) | RH_DorsAttn_Post_1               | (50, -54, -16)      | RH_Vis_1                         | (38, -34, -24) |
| 27 |                         |                | RH_Vis_4                         | (12, -64, -4)  | RH_DorsAttn_Post_2               | (52, -60, 10)       | RH_DorsAttn_Post_8               | (26, -62, 58)  |
| 28 |                         |                | RH_Vis_7                         | (16, -46, -2)  | RH_DorsAttn_FEF_2                | (26, 8, 58)         | RH_DorsAttn_FEF_1                | (34, -4, 52)   |
| 29 |                         |                | RH_Vis_10                        | (22, -60, 8)   | RH_SalVentAttn_Tem-<br>pOccPar_2 | (60, -38, 16)       | RH_DorsAttn_PrCv_1               | (52, 10, 20)   |
| 30 |                         |                | RH_Vis_11                        | (42, -80, 10)  | RH_SalVentAttn_FrOperIns_1       | (40, 6, -16)        | RH_SalVentAttn_Tem-<br>pOccPar_2 | (60, -38, 16)  |
| 31 |                         |                | RH_DorsAttn_Post_2               | (52, -60, 10)  | RH_SalVentAttn_FrOperIns_4       | (44, 6, 4)          | RH_SalVentAttn_FrOperIns_4       | (44, 6, 4)     |
| 32 |                         |                | RH_SalVentAttn_Tem-<br>pOccPar_2 | (60, -38, 16)  | RH_Cont_Temp_1                   | (62, -42, -12)      | RH_Limbic_OFC_1                  | (12, 38, -22)  |
| 33 |                         |                | RH_SalVentAttn_FrOperIns_4       | (44, 6, 4)     | RH_Cont_PFCI_5                   | (30, 48, 28)        | RH_Cont_Par_2                    | (52, -42, 48)  |
| 34 |                         |                | RH_Default_Par_2                 | (54, -50, 28)  | RH_Default_Par_1                 | (46, -70, 28)       | RH_Cont_Temp_1                   | (62, -42, -12) |
| 35 |                         |                | RH_Default_Temp_5                | (52, -32, 2)   | LH_Vis_1                         | (-24, -54, -<br>10) | RH_Cont_PFCI_5                   | (30, 48, 28)   |
| 36 |                         |                | RH_Default_PFCdPFCm_1            | (4, 36, -14)   | LH_Vis_8                         | (-48, -70, 10)      |                                  |                |
| 37 |                         |                |                                  |                | LH_Vis_11                        | (-40, -84, 10)      |                                  |                |

|    |  |  |  |  |                            |                |  |  |
|----|--|--|--|--|----------------------------|----------------|--|--|
| 38 |  |  |  |  | LH_DorsAttn_Post_2         | (-56, -60, -2) |  |  |
| 39 |  |  |  |  | LH_DorsAttn_Post_4         | (-54, -26, 42) |  |  |
| 40 |  |  |  |  | LH_DorsAttn_PrCv_1         | (-48, 6, 28)   |  |  |
| 41 |  |  |  |  | LH_SalVentAttn_FrOperIns_1 | (-40, -4, -4)  |  |  |
| 42 |  |  |  |  | LH_SalVentAttn_FrOperIns_3 | (-38, 0, 10)   |  |  |
| 43 |  |  |  |  | RH_Vis_11                  | (42, -80, 10)  |  |  |
| 44 |  |  |  |  | RH_DorsAttn_PrCv_1         | (52, 10, 20)   |  |  |
| 45 |  |  |  |  | RH_SalVentAttn_Med_1       | (8, 10, 42)    |  |  |
| 46 |  |  |  |  | RH_Cont_Par_2              | (52, -42, 48)  |  |  |
| 47 |  |  |  |  | RH_Cont_Par_3              | (38, -62, 48)  |  |  |
| 48 |  |  |  |  | RH_Default_PFCdPFCm_4      | (8, 58, 18)    |  |  |

for each layer, we took the ROIs that selected as the top salient ROIs for more than half of the times in the 10-folds (above 5 times) as the final salient ROIs. So the number of salient ROIs varied for each layer.

**Table S3.** Description of ROI's abbreviation.

| ROI name                 | Network name               | Full component name                  |
|--------------------------|----------------------------|--------------------------------------|
| LH_Vis                   | visual                     | visual                               |
| LH_SomMot                | somatomotor                | somatomotor                          |
| LH_DorsAttn_Post         | dorsal attention           | posterior                            |
| LH_DorsAttn_FEF          | dorsal attention           | frontal eye fields                   |
| LH_DorsAttn_PrCv         | dorsal attention           | precentral ventral                   |
| LH_SalVentAttn_ParOper   | salience/ventral attention | parietal operculum                   |
| LH_SalVentAttn_TempOcc   | salience/ventral attention | temporal occipital                   |
| LH_SalVentAttn_FrOperIns | salience/ventral attention | frontal operculum insula             |
| LH_SalVentAttn_PFCl      | salience/ventral attention | lateral prefrontal cortex            |
| LH_SalVentAttn_Med       | salience/ventral attention | medial                               |
| LH_Limbic_OFC            | limbic                     | orbital frontal cortex               |
| LH_Limbic_TempPole       | limbic                     | temporal pole                        |
| LH_Cont_Par              | control                    | parietal                             |
| LH_Cont_Temp             | control                    | temporal                             |
| LH_Cont_PFCd             | control                    | dorsal prefrontal cortex             |
| LH_Cont_PFCl             | control                    | lateral prefrontal cortex            |
| LH_Cont_OFC              | control                    | orbital frontal cortex               |
| LH_Cont_PFCv             | control                    | ventral prefrontal cortex            |
| LH_Cont_pCun             | control                    | precuneus                            |
| LH_Cont_Cing             | control                    | cingulate                            |
| LH_Cont_PFCmp            | control                    | medial posterior prefrontal cortex   |
| LH_Default_Par           | default                    | parietal                             |
| LH_Default_Temp          | default                    | temporal                             |
| LH_Default_PFC           | default                    | prefrontal cortex                    |
| LH_Default_pCunPCC       | default                    | precuneus posterior cingulate cortex |

|                           |                            |                                                   |
|---------------------------|----------------------------|---------------------------------------------------|
| LH_Default_PHC            | default                    | parahippocampal cortex                            |
| RH_Vis                    | visual                     | visual                                            |
| RH_SomMot                 | somatomotor                | somatomotor                                       |
| RH_DorsAttn_Post          | dorsal attention           | posterior                                         |
| RH_DorsAttn_FEF           | dorsal attention           | frontal eye fields                                |
| RH_DorsAttn_PrCv          | dorsal attention           | precentral ventral                                |
| RH_SalVentAttn_TempOccPar | salience/ventral attention | temporal occipital parietal                       |
| RH_SalVentAttn_PrC        | salience/ventral attention | precentral                                        |
| RH_SalVentAttn_FrOperIns  | salience/ventral attention | frontal operculum insula                          |
| RH_SalVentAttn_PFCv       | salience/ventral attention | ventral prefrontal cortex                         |
| RH_SalVentAttn_PFCl       | salience/ventral attention | lateral prefrontal cortex                         |
| RH_SalVentAttn_Med        | salience/ventral attention | medial                                            |
| RH_Limbic_OFC             | limbic                     | orbital frontal cortex                            |
| RH_Limbic_TempPole        | limbic                     | temporal pole                                     |
| RH_Cont_Par               | control                    | parietal                                          |
| RH_Cont_Temp              | control                    | temporal                                          |
| RH_Cont_PFCv              | control                    | ventral prefrontal cortex                         |
| RH_Cont_PFCl              | control                    | lateral prefrontal cortex                         |
| RH_Cont_pCun              | control                    | precuneus                                         |
| RH_Cont_Cing              | control                    | cingulate                                         |
| RH_Cont_PFCmp             | control                    | medial posterior prefrontal cortex                |
| RH_Default_Par            | default                    | parietal                                          |
| RH_Default_Temp           | default                    | temporal                                          |
| RH_Default_PFCv           | default                    | ventral prefrontal cortex                         |
| RH_Default_PFCdPFCm       | default                    | dorsal prefrontal cortex medial prefrontal cortex |
| RH_Default_pCunPCC        | default                    | precuneus posterior cingulate cortex              |

LH represents the left hemisphere and RH represents the right hemisphere of the brain.
